# Supplementary material for: Viral skin diseases in odontocete cetaceans: gross, histopathological, and molecular characterization of selected pathogens
Source: PubMed Central journal article supplement (PMC10514499; doi:10.3389/fvets.2023.1188105), 2023-09-08
Supplement: Table_1.pdf [file Table_1.pdf]

**Supplementary Table 1** Biological and stranding conditions of the 31 cetaceans included in the present study.

| CASE N. | ID CODE  | SPECIES                 | AGE | SEX | SD         | SL            | SS | DC | CM |
|---------|----------|-------------------------|-----|-----|------------|---------------|----|----|----|
| 1       | CET 566  | <i>S. coeruleoalba</i>  | A   | F   | 26/03/2011 | Tenerife      | D  | 2  | F  |
| 2       | CET 601  | <i>S. frontalis</i>     | J   | M   | 05/02/2012 | Tenerife      | D  | 2  | RT |
| 3       | CET 642  | <i>S. frontalis</i>     | A   | F   | 01/02/2013 | Lanzarote     | A  | 1  | RT |
| 4       | CET 663  | <i>D. delphis</i>       | A   | F   | 06/05/2013 | Tenerife      | A  | 2  | RT |
| 5       | CET 705  | <i>S. coeruleoalba</i>  | J   | F   | 23/03/2014 | Gran Canaria  | A  | 1  | R  |
| 6       | CET 748  | <i>S. coeruleoalba</i>  | J   | M   | 06/03/2015 | Lanzarote     | A  | 2  | RT |
| 7       | CET 751  | <i>G. griseus</i>       | A   | F   | 16/03/2015 | Tenerife      | D  | 4  | F  |
| 8       | CET 947  | <i>D. delphis</i>       | J   | M   | 02/01/2019 | Fuerteventura | D  | 4  | F  |
| 9       | CET 951  | <i>S. coeruleoalba</i>  | C   | M   | 23/01/2019 | La Palma      | D  | 2  | F  |
| 10      | CET 959  | <i>S. coeruleoalba</i>  | A   | M   | 19/02/2019 | Fuerteventura | D  | 4  | F  |
| 11      | CET 969  | <i>G. macrorhynchus</i> | C   | M   | 24/03/2019 | Tenerife      | A  | 1  | RT |
| 12      | CET 983  | <i>S. coeruleoalba</i>  | J   | M   | 20/04/2019 | Gran Canaria  | D  | 2  | F  |
| 13      | CET 984  | <i>G. griseus</i>       | C   | M   | 26/04/2019 | Gran Canaria  | A  | 1  | RT |
| 14      | CET 985  | <i>S. coeruleoalba</i>  | A   | M   | 27/04/2019 | Tenerife      | D  | 2  | RT |
| 15      | CET 991  | <i>S. coeruleoalba</i>  | A   | F   | 09/05/2019 | Fuerteventura | D  | 2  | R  |
| 16      | CET 995  | <i>G. macrorhynchus</i> | J   | M   | 20/05/2019 | Gran Canaria  | D  | 2  | R  |
| 17      | CET 1020 | <i>T. truncatus</i>     | J   | F   | 09/08/2019 | Tenerife      | D  | 2  | RT |
| 18      | CET 1035 | <i>S. coeruleoalba</i>  | J   | F   | 04/10/2019 | Fuerteventura | A  | 2  | F  |
| 19      | CET 1044 | <i>S. frontalis</i>     | C   | F   | 05/12/2019 | Tenerife      | D  | 4  | RT |
| 20      | CET 1045 | <i>D. delphis</i>       | A   | F   | 05/12/2019 | Fuerteventura | A  | 2  | F  |
| 21      | CET 1056 | <i>S. frontalis</i>     | C   | M   | 24/01/2020 | Tenerife      | D  | 2  | RT |
| 22      | CET 1058 | <i>S. frontalis</i>     | C   | M   | 27/01/2020 | Gran Canaria  | D  | 2  | F  |
| 23      | CET 1067 | <i>S. frontalis</i>     | C   | F   | 12/03/2020 | Tenerife      | D  | 2  | F  |
| 24      | CET 1069 | <i>S. coeruleoalba</i>  | A   | M   | 13/03/2020 | Gran Canaria  | D  | 2  | F  |
| 25      | CET 1103 | <i>T. truncatus</i>     | C   | M   | 13/06/2020 | Gran Canaria  | A  | 2  | RT |
| 26      | CET 1138 | <i>S. frontalis</i>     | C   | M   | 18/12/2020 | Gran Canaria  | D  | 2  | F  |
| 27      | CET 1151 | <i>T. truncatus</i>     | C   | M   | 21/02/2021 | Tenerife      | D  | 2  | RT |
| 28      | CET 1152 | <i>S. frontalis</i>     | C   | M   | 26/02/2021 | Gran Canaria  | A  | 1  | F  |
| 29      | CET 1153 | <i>D. delphis</i>       | A   | M   | 02/03/2021 | Gran Canaria  | D  | 2  | F  |
| 30      | CET 1173 | <i>S. frontalis</i>     | J   | F   | 17/04/2021 | Tenerife      | D  | 2  | RT |
| 31      | CET 1181 | <i>G. macrorhynchus</i> | C   | F   | 05/12/2021 | Tenerife      | D  | 2  | RT |

\*AGE (A = adult, J = juvenile, C = calf, N = neonate); SEX (F = female, M = male); SD (stranding date); SL (stranding location); SS (stranding stage: A = alive; D = dead); DC (decomposition code); CM (conservation method); DC ( 1 = extremely fresh carcass, 2 = fresh carcass, 3 = moderate decomposition, 4 = advanced decomposition, and 5 = mummified or skeletal remains); CM (F = frozen, RT = room temperature)

**Supplementary Table 2** Gross classification and histopathology of the 55 skin lesions with their respective molecular results from the 31 animals of the present study.

| CASE N. | ID CODE | MACROSCOPIC CLASSIFICATION |                                                                                                                  | HISTOPATHOLOGICAL FINDINGS                                                                               | MOLECULAR RESULTS  | ASSOCIATED RAKE MARKS/WOUNDS |
|---------|---------|----------------------------|------------------------------------------------------------------------------------------------------------------|----------------------------------------------------------------------------------------------------------|--------------------|------------------------------|
| 1       | CET 566 | A1                         |  <p>WHITE - FRINGED</p>        | NE                                                                                                       | Negative           | Yes                          |
| 2       | CET 601 | A1*                        |  <p>TATTOO-LIKE COALESCED</p> | <p>Minimal hyperkeratosis, acanthosis, and ballooning degeneration.</p> <p>Mild intracellular edema.</p> | CePV-1+ (ON600451) | No                           |

|   |         |    |                                                                                                                   |                                                                                                                                                                                                             |                                               |           |
|---|---------|----|-------------------------------------------------------------------------------------------------------------------|-------------------------------------------------------------------------------------------------------------------------------------------------------------------------------------------------------------|-----------------------------------------------|-----------|
| 3 | CET 642 | A1 |  <p>TATTOO-LIKE SERPIGINOUS</p> | <p>Minimal necrosis.</p> <p>Mild acanthosis, intracellular edema, and inflammatory cell infiltration.</p> <p>Moderate hyperkeratosis, ballooning degeneration and congestion.</p> <p>Presence of ICIBs.</p> | <p>CePV-1+ (ON600452);<br/>HV+ (OM456331)</p> | <p>No</p> |
| 4 | CET 663 | A1 |  <p>TATTOO-LIKE OVAL SHAPE</p>  | <p>NE</p>                                                                                                                                                                                                   | <p>CePV-1+ (ON600453)</p>                     | <p>No</p> |
| 5 | CET 705 | A1 |                                | <p>Minimal ballooning degeneration and intracellular edema.</p> <p>Mild hyperkeratosis and acanthosis.</p> <p>Moderate congestion.</p> <p>Presence of ICIBs.</p>                                            | <p>CePV-1+ (ON600454)</p>                     | <p>No</p> |

| TATTOO-LIKE SERPIGINOUS |         |    |                                                                                    |  |                                                                                                                                                                                                                                      |                    |     |
|-------------------------|---------|----|------------------------------------------------------------------------------------|--|--------------------------------------------------------------------------------------------------------------------------------------------------------------------------------------------------------------------------------------|--------------------|-----|
| 6                       | CET 748 | A1 |  |  | NE                                                                                                                                                                                                                                   | CePV-1+ (ON600455) | Yes |
| TATTOO-LIKE SERPIGINOUS |         |    |                                                                                    |  |                                                                                                                                                                                                                                      |                    |     |
| 7                       | CET 751 | A1 |  |  | <p>Minimal spongiosis, hyperpigmentation, fused rete ridges, inflammatory cell infiltration and dyskeratosis/apoptosis.</p> <p>Mild acanthosis.</p> <p>Moderate hyperkeratosis, ballooning degeneration and intracellular edema.</p> | CePV-1+ (ON600456) | Yes |
| TATTOO-LIKE OVAL SHAPE  |         |    |                                                                                    |  |                                                                                                                                                                                                                                      |                    |     |

|    |         |    |                                                                                                                  |                                                                                                                                                                                                                                           |                                       |     |
|----|---------|----|------------------------------------------------------------------------------------------------------------------|-------------------------------------------------------------------------------------------------------------------------------------------------------------------------------------------------------------------------------------------|---------------------------------------|-----|
| 8  | CET 947 | A3 |  <p>TATTOO-LIKE OVAL SHAPE</p> | NE                                                                                                                                                                                                                                        | CePV-1+ (ON600460);<br>HV+ (OM456332) | Yes |
| 9  | CET 951 | A1 |  <p>TATTOO-LIKE OVAL SHAPE</p> | <p>Minimal presence of pearl corns.</p> <p>Mild inflammatory cell infiltration and congestion.</p> <p>Moderate acanthosis, necrosis, and dyskeratosis/apoptosis.</p> <p>Presence of ICIBs and INIBs.</p> <p>Presence of satellitosis.</p> | CePV-1+ (ON600461);<br>HV+ (OM456333) | No  |
| 10 | CET 959 | A1 |                               | Minimal inflammatory cell infiltration                                                                                                                                                                                                    | Negative                              | Yes |

|    |         |    | ULCERATIVE                                                                         |                                                                                                                                                                            |                    |     |
|----|---------|----|------------------------------------------------------------------------------------|----------------------------------------------------------------------------------------------------------------------------------------------------------------------------|--------------------|-----|
| 11 | CET 969 | A6 |  | Minimal intracellular edema, inflammatory cell infiltration and congestion.<br><br>Mild hyperkeratosis, acanthosis, and ballooning degeneration.<br><br>Presence of ICIBs. | CePV-1+ (ON600462) | No  |
| 12 | CET 983 | A3 |  | Minimal acanthosis, hyperpigmentation, inflammatory cell infiltration and presence of pearl corns.                                                                         | CePV-1+ (ON600463) | Yes |

TATTOO-LIKE OVAL SHAPE

TATTOO-LIKE COALESCED

|    |         |    |                                                                                                                                                |  |                                                                                                                                                                                                                                                                                                 |                                       |     |
|----|---------|----|------------------------------------------------------------------------------------------------------------------------------------------------|--|-------------------------------------------------------------------------------------------------------------------------------------------------------------------------------------------------------------------------------------------------------------------------------------------------|---------------------------------------|-----|
| 13 | CET 984 | A4 | 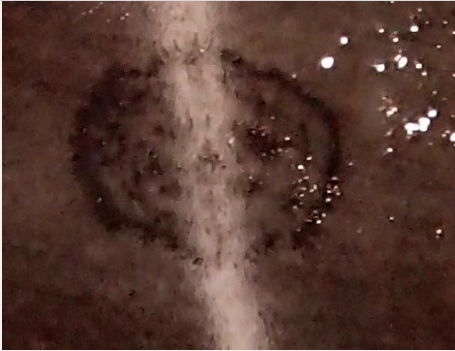 <p data-bbox="763 587 1046 608">TATTOO-LIKE OVAL SHAPE</p>  |  | NA                                                                                                                                                                                                                                                                                              | CePV-1+ (ON600464);<br>HV+ (OM456334) | Yes |
| 14 | CET 985 | A1 |  <p data-bbox="763 967 1046 987">TATTOO-LIKE SERPIGINOUS</p> |  | <p data-bbox="1317 667 1473 687">Minimal necrosis.</p> <p data-bbox="1267 715 1525 815">Mild hyperkeratosis, acanthosis, ballooning degeneration and intracellular edema.</p> <p data-bbox="1301 842 1491 863">Moderate congestion.</p> <p data-bbox="1312 890 1480 911">Presence of ICIBs.</p> | CePV-1+ (ON600465);<br>HV+ (OM456335) | Yes |
| 15 | CET 991 | A3 |                                                             |  | Absence of associated histopathological changes                                                                                                                                                                                                                                                 | Negative                              | Yes |

|    |          |    | RING                                                                               |                                                                                                                                                                                                                                                       |                                       |     |
|----|----------|----|------------------------------------------------------------------------------------|-------------------------------------------------------------------------------------------------------------------------------------------------------------------------------------------------------------------------------------------------------|---------------------------------------|-----|
| 16 | CET 995  | A1 | 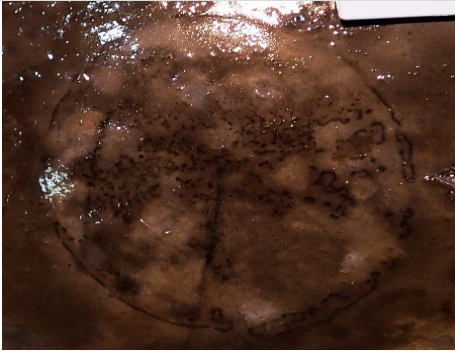 | Minimal hyperkeratosis and ballooning degeneration.<br><br>Mild acanthosis, spongiosis, inflammatory cell infiltration and dyskeratosis/apoptosis.<br><br>Severe congestion.                                                                          | CePV-1+ (ON600457)                    | Yes |
| 17 | CET 1020 | A1 |  | Minimal spongiosis, necrosis, fused rete ridges and inflammatory cell infiltration.<br><br>Mild hyperkeratosis and acanthosis, and dyskeratosis/apoptosis.<br><br>Moderate ballooning degeneration and intracellular edema.<br><br>Presence of ICIBs. | CePV-1+ (ON600466);<br>HV+ (OM456336) | No  |



|    |          |    |                                                                                                                                     |                                                                                                                                                                                                                        |                  |     |
|----|----------|----|-------------------------------------------------------------------------------------------------------------------------------------|------------------------------------------------------------------------------------------------------------------------------------------------------------------------------------------------------------------------|------------------|-----|
| 18 | CET 1035 | A2 |  <p data-bbox="819 584 992 608">BLACK-FRINGED</p> | <p data-bbox="1267 336 1525 389">Minimal hyperkeratosis and inflammatory cell infiltration.</p> <p data-bbox="1323 411 1469 435">Mild acanthosis.</p> <p data-bbox="1279 458 1514 481">Moderate fused rete ridges.</p> | CeMV+ (ON314830) | Yes |
| 19 | CET 1044 | A1 |  <p data-bbox="875 959 936 983">RING</p>          | NA                                                                                                                                                                                                                     | HV+ (OM456337)   | Yes |
| 20 | CET 1045 | A4 |                                                  | NA                                                                                                                                                                                                                     | HV+ (OM456338)   | Yes |

|    |          |    |  | ULCERATIVE                                                                                              |                                                                                                                                                    |                                       |    |
|----|----------|----|--|---------------------------------------------------------------------------------------------------------|----------------------------------------------------------------------------------------------------------------------------------------------------|---------------------------------------|----|
| 21 | CET 1056 | A1 |  | 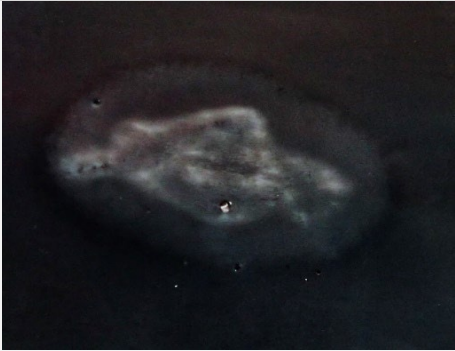 <p>BLACK-FRINGED</p> | <p>Minimal fused rete ridges and inflammatory cell infiltration.</p> <p>Mild hypopigmentation and congestion.</p> <p>Moderate acanthosis.</p>      | HV+ (OM456339)                        | No |
| 22 | CET 1058 | A1 |  |  <p>BLACK-FRINGED</p> | <p>Minimal ballooning degeneration, intracellular edema, and congestion.</p> <p>Mild inflammatory cell infiltration.</p> <p>Moderate necrosis.</p> | CePV-1+ (ON600467);<br>HV+ (OM456340) | No |

|    |          |     |                                                                                                                                |                                                                                                                                                                                                                                                                                                                                                                                        |                    |     |
|----|----------|-----|--------------------------------------------------------------------------------------------------------------------------------|----------------------------------------------------------------------------------------------------------------------------------------------------------------------------------------------------------------------------------------------------------------------------------------------------------------------------------------------------------------------------------------|--------------------|-----|
| 23 | CET 1067 | A3  |  <p data-bbox="846 585 963 608">TORTUOUS</p> | <p data-bbox="1294 300 1496 375">Mild acanthosis,<br/>hypopigmentation, and<br/>presence of pearl corns.</p> <p data-bbox="1267 400 1525 475">Moderate hyperkeratosis,<br/>necrosis, fused rete ridges and<br/>inflammatory cell infiltration.</p> <p data-bbox="1317 501 1476 523">Presence of ICIBs.</p>                                                                             | HV+ (ON314829)     | No  |
| 24 | CET 1069 | A1  |  <p data-bbox="875 963 934 986">RING</p>     | NE                                                                                                                                                                                                                                                                                                                                                                                     | CePV-1+ (ON600468) | Yes |
| 25 | CET 1103 | A2* |                                             | <p data-bbox="1294 1010 1496 1085">Minimal necrosis,<br/>hyperpigmentation, and<br/>hypopigmentation.</p> <p data-bbox="1294 1110 1496 1185">Mild hyperkeratosis,<br/>intracellular edema, and<br/>congestion.</p> <p data-bbox="1267 1211 1525 1259">Moderate acanthosis and<br/>inflammatory cell infiltration.</p> <p data-bbox="1294 1284 1496 1307">Severe fused rete ridges.</p> | HV+ (OM456341)     | No  |

|    |          |    | PALE                                                                                |  | Presence of INIBs. |                |     |
|----|----------|----|-------------------------------------------------------------------------------------|--|--------------------|----------------|-----|
| 26 | CET 1138 | A1 |   |  | NE                 | HV+ (OM456342) | Yes |
|    |          | A2 |  |  | NA                 | HV+ (OM456342) | Yes |

WHITE-FRINGED

WHITE-FRINGED

|  |  |    |                                                                                                       |  |    |                |     |
|--|--|----|-------------------------------------------------------------------------------------------------------|--|----|----------------|-----|
|  |  | A3 |  <p>TARGET-LIKE</p> |  | NE | HV+ (OM456342) | Yes |
|  |  | A4 |  <p>TARGET-LIKE</p> |  | NE | Negative       | Yes |
|  |  | A5 |  <p>ULCERATIVE</p> |  | NE | HV+ (OM456342) | No  |

|    |          |     |                                                                                                                                                                                                                                                                                                                                                                                          |                                                                                                                                                                                     |                                                |     |
|----|----------|-----|------------------------------------------------------------------------------------------------------------------------------------------------------------------------------------------------------------------------------------------------------------------------------------------------------------------------------------------------------------------------------------------|-------------------------------------------------------------------------------------------------------------------------------------------------------------------------------------|------------------------------------------------|-----|
| 27 | CET 1151 | A1* | <p>Image rights not deserved.<br/> <i>Image previously reported in: "Segura-Göthlin, S., A. Fernández, M. Arbelo, I. Felipe-Jiménez, A. Colom-Rivero, J. Almunia, and E. Sierra, 2021: The Validation of a Non-Invasive Skin Sampling Device for Detecting Cetacean Poxvirus. Anim. 2021, Vol. 11, Page 2814 11, 2814, DOI: 10.3390/ANI11102814".</i></p> <p>TATTOO-LIKE SERPIGINOUS</p> | <p>Minimal intracellular edema and fused rete ridges.</p> <p>Mild acanthosis, ballooning degeneration and congestion.</p> <p>Moderate hyperkeratosis.</p> <p>Presence of ICIBs.</p> | <p>CePV-1+ (ON600458);<br/> HV+ (OM456343)</p> | No  |
|    |          | A3  |  <p>TARGET-LIKE</p>                                                                                                                                                                                                                                                                                    | NA                                                                                                                                                                                  | HV+ (OM456344)                                 | Yes |
|    |          | A4  |  <p>ULCERATIVE</p>                                                                                                                                                                                                                                                                                    | NA                                                                                                                                                                                  | HV+ (OM456343)                                 | No  |
|    |          | A6* | <p>Image rights not deserved.<br/> <i>Image previously reported in: "Segura-Göthlin, S., A. Fernández, M. Arbelo, I. Felipe-Jiménez, A. Colom-Rivero, J. Almunia, and E. Sierra, 2021: The Validation of a Non-Invasive Skin Sampling Device for Detecting Cetacean</i></p>                                                                                                              | <p>Minimal intracellular edema and pearl corns.</p>                                                                                                                                 | <p>CePV-1+ (ON600458);<br/> HV+ (OM456344)</p> | No  |

|    |          |    | <i>Poxvirus. Anim. 2021, Vol. 11, Page 2814 II, 2814, DOI: 10.3390/ANI11102814</i>  |  | Mild hyperkeratosis, ballooning degeneration and acanthosis.<br>Presence of ICIBs.                                                    |                |    |
|----|----------|----|-------------------------------------------------------------------------------------|--|---------------------------------------------------------------------------------------------------------------------------------------|----------------|----|
|    |          |    | RING                                                                                |  |                                                                                                                                       |                |    |
| 28 | CET 1152 | A1 |   |  | Minimal hyperkeratosis, acanthosis, necrosis, and inflammatory cell infiltration.                                                     | HV+ (OM456345) | No |
|    |          | A2 |  |  | Minimal hyperkeratosis, necrosis, fused rete ridges, inflammatory cell infiltration, congestion, and pearl corns.<br>Mild acanthosis. | HV+ (OM456345) | No |

|  |  |    |                                                                                                      |  |                                                                                                                                                               |                |     |
|--|--|----|------------------------------------------------------------------------------------------------------|--|---------------------------------------------------------------------------------------------------------------------------------------------------------------|----------------|-----|
|  |  | A3 | <br>TORTUOUS       |  | Mild hyperkeratosis and acanthosis.<br><br>Moderate necrosis and inflammatory cell infiltration.                                                              | Negative       | No  |
|  |  | A4 | <br>RING           |  | Minimal acanthosis, intracellular edema, inflammatory cell infiltration and congestion.                                                                       | HV+ (OM456345) | Yes |
|  |  | A5 | <br>BLACK-FRINGED |  | Minimal intracellular edema and dyskeratosis/apoptosis.<br><br>Mild hyperkeratosis, acanthosis, and necrosis.<br><br>Moderate inflammatory cell infiltration. | HV+ (OM456345) | No  |



|    |          |    |                                                                                     |                                                                                                                            |          |    |
|----|----------|----|-------------------------------------------------------------------------------------|----------------------------------------------------------------------------------------------------------------------------|----------|----|
| 29 | CET 1153 | A1 |   | Minimal inflammatory cell infiltration.<br>Moderate hyperkeratosis, acanthosis, and fused rete ridges.                     | Negative | No |
|    |          | A2 |   | Minimal inflammatory cell infiltration and congestion.<br>Mild hyperkeratosis, acanthosis, and fused rete ridges.          | Negative | No |
|    |          | A3 |  | Minimal acanthosis, inflammatory cell infiltration, congestion, and dyskeratosis/apoptosis.<br>Moderate fused rete ridges. | Negative | No |

|    |          |     |                                                                                                                                                                                                                                                                                                                                                                                         |                                                                                                                                                                                                                                                                                                                                                                                |                                                                                                                                                                                              |                    |
|----|----------|-----|-----------------------------------------------------------------------------------------------------------------------------------------------------------------------------------------------------------------------------------------------------------------------------------------------------------------------------------------------------------------------------------------|--------------------------------------------------------------------------------------------------------------------------------------------------------------------------------------------------------------------------------------------------------------------------------------------------------------------------------------------------------------------------------|----------------------------------------------------------------------------------------------------------------------------------------------------------------------------------------------|--------------------|
| 30 | CET 1173 | A1* | <p>Image rights not deserved.<br/> <i>Image previously reported in: "Segura-Göthlin, S., A. Fernández, M. Arbelo, I. Felipe-Jiménez, A. Colom-Rivero, J. Almunia, and E. Sierra, 2021: The Validation of a Non-Invasive Skin Sampling Device for Detecting Cetacean Poxvirus. Anim. 2021, Vol. 11, Page 2814 II, 2814, DOI: 10.3390/ANI11102814".</i></p> <p>TATTOO-LIKE OVAL SHAPE</p> | <p>Minimal congestion.</p> <p>Mild acanthosis, intracellular edema, hyperpigmentation, and inflammatory cell infiltration.</p> <p>Moderate hyperkeratosis and ballooning degeneration.</p> <p>Presence of ICIBs.</p>                                                                                                                                                           | CePV-1+ (ON600459)                                                                                                                                                                           | No                 |
|    |          | A2* |                                                                                                                                                                                                                                                                                                                                                                                         | <p>Minimal congestion.</p> <p>Mild acanthosis, intracellular edema, hyperpigmentation, and inflammatory cell infiltration.</p> <p>Moderate hyperkeratosis and ballooning degeneration.</p> <p>Presence of ICIBs.</p>                                                                                                                                                           | CePV-1+ (ON600459)                                                                                                                                                                           | No                 |
|    |          | A3* |                                                                                                                                                                                                                                                                                                                                                                                         | <p>Minimal congestion.</p> <p>Mild acanthosis, intracellular edema, hyperpigmentation, and inflammatory cell infiltration.</p> <p>Moderate hyperkeratosis and ballooning degeneration.</p> <p>Presence of ICIBs.</p>                                                                                                                                                           | CePV-1+ (ON600459)                                                                                                                                                                           | No                 |
|    |          | A4* |                                                                                                                                                                                                                                                                                                                                                                                         | <p>Image rights not deserved.<br/> <i>Image previously reported in: "Segura-Göthlin, S., A. Fernández, M. Arbelo, I. Felipe-Jiménez, A. Colom-Rivero, J. Almunia, and E. Sierra, 2021: The Validation of a Non-Invasive Skin Sampling Device for Detecting Cetacean Poxvirus. Anim. 2021, Vol. 11, Page 2814 II, 2814, DOI: 10.3390/ANI11102814".</i></p> <p>BLACK-FRINGED</p> | <p>Minimal acanthosis, ballooning degeneration, intracellular edema, congestion, and dyskeratosis/apoptosis.</p> <p>Mild hyperkeratosis, spongiosis, and inflammatory cell infiltration.</p> | CePV-1+ (ON600459) |

|  |  |      |                                                                                                                                                                                                                                                                                                                                                              |                                                                                                                                                                                           |                    |    |
|--|--|------|--------------------------------------------------------------------------------------------------------------------------------------------------------------------------------------------------------------------------------------------------------------------------------------------------------------------------------------------------------------|-------------------------------------------------------------------------------------------------------------------------------------------------------------------------------------------|--------------------|----|
|  |  | A5*  |                                                                                                                                                                                                                                                                                                                                                              | Minimal ballooning degeneration and dyskeratosis/apoptosis.<br><br>Mild acanthosis, hyperpigmentation, and congestion.<br><br>Moderate hyperkeratosis and inflammatory cell infiltration. | CePV-1+ (ON600459) | No |
|  |  | A6*  | Image rights not deserved.<br><i>Image previously reported in: "Segura-Göthlin, S., A. Fernández, M. Arbelo, I. Felipe-Jiménez, A. Colom-Rivero, J. Almunia, and E. Sierra, 2021: The Validation of a Non-Invasive Skin Sampling Device for Detecting Cetacean Poxvirus. Anim. 2021, Vol. 11, Page 2814 11, 2814, DOI: 10.3390/ANI11102814".</i>             | Minimal hyperkeratosis, acanthosis, hyperpigmentation, and inflammatory cell infiltration.                                                                                                | CePV-1+ (ON600459) | No |
|  |  | A7*  |                                                                                                                                                                                                                                                                                                                                                              | WHITE-FRINGED<br><br>Minimal acanthosis, inflammatory cell infiltration, and congestion.                                                                                                  | CePV-1+ (ON600459) | No |
|  |  | A8*  | Image rights not deserved.<br><i>Image previously reported in: "Segura-Göthlin, S., A. Fernández, M. Arbelo, I. Felipe-Jiménez, A. Colom-Rivero, J. Almunia, and E. Sierra, 2021: The Validation of a Non-Invasive Skin Sampling Device for Detecting Cetacean Poxvirus. Anim. 2021, Vol. 11, Page 2814 11, 2814, DOI: 10.3390/ANI11102814".</i><br><br>RING | NA                                                                                                                                                                                        | CePV-1+ (ON600459) | No |
|  |  | A9*  | Image rights not deserved.<br><i>Image previously reported in: "Segura-Göthlin, S., A. Fernández, M. Arbelo, I. Felipe-Jiménez, A. Colom-Rivero, J. Almunia, and E. Sierra, 2021: The Validation of a Non-Invasive Skin Sampling Device for Detecting Cetacean Poxvirus. Anim. 2021, Vol. 11, Page 2814 11, 2814, DOI: 10.3390/ANI11102814".</i>             | Minimal acanthosis, fused rete ridges, and inflammatory cell infiltration.<br><br>Mild congestion.                                                                                        | CePV-1+ (ON600459) | No |
|  |  | A10* |                                                                                                                                                                                                                                                                                                                                                              | WHITE-FRINGED<br><br>NA                                                                                                                                                                   | CePV-1+ (ON600459) | No |

|    |          |    |                                                                                                                  |                                                                                                                                         |                    |    |
|----|----------|----|------------------------------------------------------------------------------------------------------------------|-----------------------------------------------------------------------------------------------------------------------------------------|--------------------|----|
| 31 | CET 1181 | A1 |  <p>TATTOO-LIKE OVAL SHAPE</p> | <p>Minimal acanthosis and dyskeratosis/apoptosis.</p> <p>Mild hyperkeratosis and ballooning degeneration.</p> <p>Presence of ICIBs.</p> | CePV-1+ (ON600469) | No |
|    |          | A2 |  <p>TATTOO-LIKE COALESCED</p>  | <p>Minimal ballooning degeneration.</p>                                                                                                 | Negative           | No |
|    |          | A3 |  <p>BLACK-FRINGED</p>         | <p>Minimal hyperkeratosis, acanthosis, and inflammatory cell infiltration.</p>                                                          | CePV-1+ (ON600469) | No |

\*CePV, cetacean poxvirus; HV, herpesvirus; CeMV, cetacean morbillivirus; A1 – A10 = skin lesion samples 1 to 10; NA, not applicable; NE, not evaluated; +, positive; -, negative. Asterisks indicate positive cases that have been previously published.

**Supplementary Table 3.** Percentage of identity of the sequences from the present study with the closest available ones in GenBank.

| CASE N. | ID CODE  | SKIN LESION | SEQUENCES        |            |               |                              |                  |            |                  |            |                         |                              |                  |            |   |
|---------|----------|-------------|------------------|------------|---------------|------------------------------|------------------|------------|------------------|------------|-------------------------|------------------------------|------------------|------------|---|
|         |          |             | Accession Number | Bp         | Organism      | CePV<br>Percentage Identity  | Isolation Source | References | Accession Number | Bp         | Organism                | HV<br>Percentage Identity    | Isolation Source | References |   |
| 1       | CET 566  | A1          | -                | -          | -             | -                            | -                | -          | -                | -          | -                       | -                            | -                | -          | - |
| 2       | CET 601  | A1          | ON600451         | 497        | CePV-1        | 93.75%<br>(OQ102395)         | Skin             | NA         | -                | -          | -                       | -                            | -                | -          | - |
| 3       | CET 642  | A1          | <b>ON600452</b>  | <b>497</b> | <b>CePV-1</b> | <b>93.75%<br/>(OQ102395)</b> | <b>Skin</b>      | <b>NA</b>  | <b>OM456331</b>  | <b>193</b> | <b>Alphaherpesvirus</b> | <b>98.45%<br/>(MG437205)</b> | <b>NA</b>        | <b>NA</b>  |   |
| 4       | CET 663  | A1          | ON600453         | 497        | CePV-1        | 100%<br>(KC409046)           | Skin             | (1)        | -                | -          | -                       | -                            | -                | -          |   |
| 5       | CET 705  | A1          | ON600454         | 497        | CePV-1        | 99.80%<br>(KC409049)         | Skin             | (1)        | -                | -          | -                       | -                            | -                | -          |   |
| 6       | CET 748  | A1          | ON600455         | 497        | CePV-1        | 99.80%<br>(KC409049)         | Skin             | (1)        | -                | -          | -                       | -                            | -                | -          |   |
| 7       | CET 751  | A1          | ON600456         | 497        | CePV-1        | 95.97%<br>(KC409049)         | Skin             | (1)        | -                | -          | -                       | -                            | -                | -          |   |
| 8       | CET 947  | A3          | <b>ON600460</b>  | <b>98</b>  | <b>CePV-1</b> | <b>96.91%<br/>(MH005249)</b> | <b>Skin</b>      | <b>(2)</b> | <b>OM456332</b>  | <b>193</b> | <b>Alphaherpesvirus</b> | <b>100%<br/>(MG437205)</b>   | <b>NA</b>        | <b>NA</b>  |   |
| 9       | CET 951  | A1          | <b>ON600461</b>  | <b>85</b>  | <b>CePV-1</b> | <b>90%<br/>(AY463006)</b>    | <b>Skin</b>      | <b>(3)</b> | <b>OM456333</b>  | <b>193</b> | <b>Alphaherpesvirus</b> | <b>97.41%<br/>(MG437205)</b> | <b>NA</b>        | <b>NA</b>  |   |
| 10      | CET 959  | A1          | -                | -          | -             | -                            | -                | -          | -                | -          | -                       | -                            | -                | -          |   |
| 11      | CET 969  | A6          | ON600462         | 98         | CePV-1        | 96.91%<br>(MH005249)         | Skin             | (2)        | -                | -          | -                       | -                            | -                | -          |   |
| 12      | CET 983  | A3          | ON600463         | 98         | CePV-1        | 96.91%<br>(MH005249)         | Skin             | (2)        | -                | -          | -                       | -                            | -                | -          |   |
| 13      | CET 984  | A4          | <b>ON600464</b>  | <b>98</b>  | <b>CePV-1</b> | <b>93.81%<br/>(MH005249)</b> | <b>Skin</b>      | <b>(2)</b> | <b>OM456334</b>  | <b>181</b> | <b>Alphaherpesvirus</b> | <b>100%<br/>(KP995683)</b>   | <b>Brain</b>     | <b>(4)</b> |   |
| 14      | CET 985  | A1          | <b>ON600465</b>  | <b>98</b>  | <b>CePV-1</b> | <b>96.91%<br/>(MH005249)</b> | <b>Skin</b>      | <b>(2)</b> | <b>OM456335</b>  | <b>169</b> | <b>Gammaherpesvirus</b> | <b>100%<br/>(KM248274)</b>   | <b>Penis</b>     | <b>(5)</b> |   |
| 15      | CET 991  | A3          | -                | -          | -             | -                            | -                | -          | -                | -          | -                       | -                            | -                | -          |   |
| 16      | CET 995  | A1          | ON600457         | 497        | CePV-1        | 94.96%<br>(KC409049)         | Skin             | (1)        | -                | -          | -                       | -                            | -                | -          |   |
| 17      | CET 1020 | A1          | <b>ON600466</b>  | <b>98</b>  | <b>CePV-1</b> | <b>96.94%<br/>(MH005249)</b> | <b>Skin</b>      | <b>(2)</b> | <b>OM456336</b>  | <b>194</b> | <b>Alphaherpesvirus</b> | <b>96.91%<br/>(MG437205)</b> | <b>NA</b>        | <b>NA</b>  |   |
| 18      | CET 1035 | A2          | -                | -          | -             | -                            | -                | -          | -                | -          | -                       | -                            | -                | -          |   |
| 19      | CET 1044 | A1          | -                | -          | -             | -                            | -                | -          | OM456337         | 190        | Alphaherpesvirus        | 100%<br>(MN179657)           | Brain            | NA         |   |



A3  
 A4  
 A5  
 A6  
 A7  
 A8  
 A9  
 A10

|    |          |    |          |    |        |                      |      |     |   |   |   |   |   |   |   |   |
|----|----------|----|----------|----|--------|----------------------|------|-----|---|---|---|---|---|---|---|---|
| 31 | CET 1181 | A1 | ON600469 | 77 | CePV-1 | 93.51%<br>(AY952950) | Skin | (3) |   |   |   |   |   |   |   |   |
|    |          | A2 | -        | -  | -      | -                    | -    | -   | - | - | - | - | - | - | - | - |
|    |          | A3 | ON600469 | 77 | CePV-1 | 93.51%<br>(AY952950) | Skin | (3) |   |   |   |   |   |   |   |   |

\*Bp, base pairs; CePV-1, cetacean poxvirus 1; HV, herpesvirus; NA, not available; -, absent.



**Supplementary Table 4** Most prevalent histologic findings in skin lesions of the present study.

| CASE N. | ID CODE  | LESION | MC   | MOST PREVALENT HISTOLOGICAL FINDINGS |     |     |    |     |     |     |    |    |      |       |       |     |      |       |    |
|---------|----------|--------|------|--------------------------------------|-----|-----|----|-----|-----|-----|----|----|------|-------|-------|-----|------|-------|----|
|         |          |        |      | Hk                                   | At  | BD  | Sp | IE  | Ne  | St  | Hp | Ho | FRR  | ICIBs | INIBs | ICI | Cg   | Dk/Ap | PC |
| 2       | CET 601  | A1     | TL-C | +                                    | +   | +   | -  | ++  | -   | no  | -  | -  | -    | no    | no    | -   | -    | -     | -  |
| 3       | CET 642  | A1     | TL-S | +++                                  | ++  | +++ | -  | ++  | +   | no  | -  | -  | -    | yes   | no    | ++  | +++  | -     | -  |
| 5       | CET 705  | A1     | TL-S | ++                                   | ++  | +   | -  | +   | --  | -   | -  | -  | -    | no    | no    | -   | +++  | -     | -  |
| 7       | CET 751  | A1     | TL-O | +++                                  | ++  | +++ | +  | +++ | -   | no  | +  | -  | +    | yes   | no    | +   | -    | +     | -  |
| 9       | CET 951  | A1     | TL-O | -                                    | +++ | -   | -  | -   | +++ | yes | -  | -  | -    | yes   | yes   | ++  | ++   | +++   | +  |
| 10      | CET 959  | A1     | U    | -                                    | -   | NE  | NE | NE  | -   | no  | -  | -  | -    | no    | no    | +   | -    | -     | -  |
| 11      | CET 969  | A6     | TL-O | ++                                   | ++  | ++  | -  | +   | -   | no  | -  | -  | -    | yes   | no    | +   | +    | -     | -  |
| 12      | CET 983  | A3     | TL-C | NE                                   | +   | NE  | NE | NE  | -   | no  | +  | -  | -    | no    | no    | +   | -    | -     | +  |
| 14      | CET 985  | A1     | TL-S | ++                                   | ++  | ++  | -  | ++  | +   | no  | -  | -  | -    | yes   | no    | -   | +++  | -     | -  |
| 15      | CET 991  | A3     | R    | NE                                   | -   | -   | -  | -   | -   | no  | -  | -  | -    | no    | no    | -   | -    | -     | -  |
| 16      | CET 995  | A1     | TL-O | +                                    | ++  | +   | ++ | NE  | -   | no  | -  | -  | -    | no    | no    | ++  | ++++ | ++    | -  |
| 17      | CET 1020 | A1     | TL-O | ++                                   | ++  | +++ | +  | +++ | +   | no  | -  | -  | +    | yes   | no    | +   | -    | ++    | -  |
| 18      | CET 1035 | A2     | BF   | +                                    | ++  | NE  | NE | NE  | -   | no  | -  | -  | +++  | no    | no    | +   | -    | -     | -  |
| 21      | CET 1056 | A1     | BF   | -                                    | +++ | -   | -  | -   | -   | no  | -  | ++ | +    | no    | no    | +   | ++   | -     | -  |
| 22      | CET 1058 | A1     | BF   | NE                                   | NE  | +   | -  | +   | +++ | no  | -  | -  | -    | no    | no    | ++  | +    | -     | -  |
| 23      | CET 1067 | A3     | Ts   | +++                                  | ++  | NE  | NE | NE  | +++ | yes | -  | ++ | +++  | no    | no    | +++ | -    | -     | ++ |
| 25      | CET 1103 | A2     | P    | ++                                   | +++ | -   | -  | ++  | +   | no  | +  | +  | ++++ | no    | yes   | +++ | ++   | -     | -  |
| 27      | CET 1151 | A1     | TL-S | +++                                  | ++  | ++  | -  | +   | -   | -   | -  | -  | +    | yes   | no    | +   | ++   | -     | -  |
|         |          | A6     | R    | ++                                   | ++  | ++  | -  | +   | -   | no  | -  | -  | -    | yes   | no    | -   | -    | -     | +  |
| 28      | CET 1152 | A1     | Ts   | +                                    | +   | -   | -  | -   | +   | no  | -  | -  | -    | no    | no    | +   | -    | -     | -  |
|         |          | A2     | WF   | +                                    | ++  | -   | -  | -   | +   | no  | -  | -  | +    | no    | no    | +   | +    | -     | +  |
|         |          | A3     | Ts   | ++                                   | ++  | -   | -  | -   | +++ | no  | -  | -  | -    | no    | no    | +++ | -    | -     | -  |
|         |          | A4     | R    | -                                    | +   | -   | -  | +   | -   | no  | -  | -  | -    | no    | no    | +   | +    | -     | -  |

|    |          |    |      |     |     |      |      |     |    |    |    |   |     |     |    |     |    |   |   |
|----|----------|----|------|-----|-----|------|------|-----|----|----|----|---|-----|-----|----|-----|----|---|---|
| 29 | CET 1153 | A5 | BF   | ++  | ++  | -    | -    | +   | ++ | no | -  | - | -   | no  | no | +++ | -  | + | - |
|    |          | A1 | BF   | +++ | +++ | -    | -    | -   | -  | no | -  | - | +++ | no  | no | +   | -  | - | - |
|    |          | A2 | Ts   | ++  | ++  | -    | -    | -   | -  | no | -  | - | ++  | no  | no | +   | +  | - | - |
|    |          | A3 | BF   | -   | ++  | -    | -    | -   | -  | no | -  | - | +++ | no  | no | +   | +  | + | - |
| 30 | CET 1173 | A1 | TL-O | +++ | ++  | +++  | -    | ++  | -  | no | ++ | - | -   | yes | no | ++  | +  | - | - |
|    |          | A2 | TL-O | +++ | ++  | +++  | -    | ++  | -  | no | ++ | - | -   | yes | no | ++  | +  | - | - |
|    |          | A3 | TL-O | +++ | +++ | ++++ | ++++ | +++ | -  | no | +  | - | -   | yes | no | -   | ++ | - | - |
|    |          | A4 | BF   | ++  | +   | +    | +    | +   | -  | no | -  | - | -   | no  | no | ++  | +  | + | - |
|    |          | A5 | BF   | +++ | ++  | +    | +    | -   | -  | no | ++ | - | -   | no  | no | +++ | ++ | + | - |
|    |          | A6 | WF   | +   | +   | -    | -    | -   | -  | no | +  | - | -   | no  | no | +   | -  | - | - |
|    |          | A7 | WF   | NE  | +   | -    | -    | -   | -  | no | -  | - | -   | no  | no | +   | +  | - | - |
| 31 | CET 1181 | A9 | WF   | NE  | +   | -    | -    | -   | no | -  | -  | + | no  | no  | +  | ++  | -  | - |   |
|    |          | A1 | TL-O | ++  | +   | ++   | -    | -   | -  | no | -  | - | -   | yes | no | -   | -  | + | - |
|    |          | A2 | TL-C | -   | -   | +    | -    | -   | -  | no | -  | - | -   | no  | no | +   | -  | - | - |
|    |          | A3 | BF   | +   | +   | -    | -    | -   | -  | no | -  | - | -   | no  | no | +   | -  | - | - |

\*Hk, hyperkeratosis; At, acanthosis; Hp, hyperplasia; BD, ballooning degeneration; Sg, spongiosis; IE, intracytoplasmic oedema; MC, macroscopic classification; Nc, necrosis; St, satellitosis; Hp; hyperpigmentation; Ho, hypopigmentation; FRR, fused rete ridges; ICIBs, inclusion bodies; INIBs, intranuclear inclusion bodies; ICI, inflammatory cell infiltration; Cg, congestion; Dk/Ap, dyskeratosis/apoptosis; PC, pearl corns; A1 – A9 = skin lesion samples 1 to 9; BF (black-fringed); R (ring); T (target-like); Ts (tortuous); TL-C (tattoo-like, coalesced); TL-S (tattoo-like, serpiginous); TL-O (tattoo-like, oval-shaped); P (pale); U (ulcerative); WF (white-fringed); NE, not evaluable; -, absent; +, minimal; ++, mild; +++, moderate; +++++, severe.
